# Marine Bacteria Associated with the Green Seaweed *Ulva* sp. for the Production of Polyhydroxyalkanoates

Rima Gnaim<sup>1,2\*</sup>, Mark Polikovskiy<sup>1</sup>, Razan Unis<sup>2</sup>, Julia Sheviriyov<sup>1</sup>, Michael Gozin<sup>3,4,5</sup> and Alexander Golberg<sup>1,\*</sup>

<sup>1</sup> Porter School of Environment and Earth Sciences, Faculty of Exact Sciences, Tel Aviv University, Tel Aviv, Israel

<sup>2</sup> The Triangle Regional Research and Development Center, Kfar Qari 30075

<sup>3</sup> School of Chemistry, Faculty of Exact sciences, Tel Aviv University, Tel Aviv, Israel

<sup>4</sup> Tel Aviv University Center for Nanoscience and Nanotechnology

<sup>5</sup> Center for Advanced Combustion Science, Tel Aviv University, Tel Aviv, Israel.

Correspondence:

Rima Gnaim, Email: [rimagnaim@mail.tau.ac.il](mailto:rimagnaim@mail.tau.ac.il). Tel: +972-54-620-5245

Alexander Golberg, Email: [agolberg@tauex.tau.ac.il](mailto:agolberg@tauex.tau.ac.il). Tel: +972-3-640-7182

## Abstract

The biosynthesis of polyhydroxyalkanoate (PHA) biopolymers from certain marine microbes, associated with green macroalgae *Ulva* sp., has attracted significant attention. The *Ulva* sp. is abundant biomass in numerous locations around the world and could be easily cultivated by marine farming. The variety of sugars found in *Ulva* sp. homogenate could be used as a carbon source for microbial growth and PHA production. In this work, we isolated and explored a series of bacterial strains that function as potential producers of P(3HB), utilizing a range of common sugars found in *Ulva* sp. Analysis of 16S rDNA gene-sequence revealed that the PHA-producing bacteria were phylogenetically related to species of the genus *Cobetia*, *Bacillus*, *Pseudoaltermonas*, and *Sulfitobacter*. The highest-yield of P(3HB) was observed in the case of new *Cobetia* strain, *C. amphilecti*, with up to 61% (w/w) in the presence of mannitol and 12% (w/w) on *Ulva* sp. acid hydrolysate as a substrate.

## Keywords

Polyhydroxyalkanoate (PHA), Polyhydroxybuterate (P3HB), Marine Bacteria, Fermentation, Green Macro-algae, *Ulva* sp. hydrolysate

39

## 40 **Introduction**

41 Limited petroleum resources and their significant environmental impacts have led to an increase  
42 in biopolymers development from renewable resources (Li et al., 2016). Among these polymers are  
43 polyhydroxyalkanoates.

44 Polyhydroxyalkanoates (PHAs) are prospective substitutes for petrochemical-derived polymers  
45 due to their biodegradability, sustainability, and versatile thermal and mechanical properties (Grigore  
46 et al., 2019; Mohammadi et al., 2015). PHAs are intracellular microbial aliphatic polyesters, which  
47 are synthesized by numerous organisms as carbon and energy storage in intercellular granules  
48 (Grigore et al., 2019). The PHAs are usually produced as a response to environmental stresses such  
49 as nutrient limitation (Kasan et al., 2015).

50 To date, around 150 various chemical structures of PHA were reported (Sagong et al., 2018).  
51 Poly- $\beta$ -hydroxybutyrate (P(3HB)) gained more recognition due to its unique physio-mechanical  
52 properties. Thus, it offers great potential for use in various industrial applications in agriculture, food  
53 packaging and bio-medical fields (Mostafa et al., 2020a). The development of desirable PHA  
54 polymers from a widespread microbial resource for industrial purposes are being investigated  
55 (Kourmentza et al., 2017). Recently, marine microbial strains such as *Alteromonas*, *Bacillus*,  
56 *Pseudomonas* spp., *Cupriavidus* spp. (Możejko-Ciesielska and Kiewisz, 2016) have gained a lot of  
57 attention, they can produce superior PHA polymers because of the stressed marine conditions they  
58 live in (Mostafa et al., 2020b).

59 Although many bacterial species have been identified to produce PHA, the potential to discover  
60 and identify novel marine species isolated from green macroalgae with vastly superior production  
61 capacity remains untapped. Besides, optimization of bacteria growth and PHA accumulation using  
62 various carbon sources presents an essential component for the commercialization of these  
63 biopolymers (Sangkharak and Prasertsan, 2012).

64 Marine macroalgae or seaweeds, especially *Ulva* sp. are one of the most attractive biomass for  
65 exploring PHA production by their associated bacteria due to macroalgae abundance in many  
66 ecosystems on earth (Wei et al., 2013). This type of seaweeds offers a lot of environmental and  
67 biotechnological benefits comparing to terrestrial crops. For example, they are easily accumulated in  
68 many areas around the world; they don't require harsh agronomical treatments, they have high growth  
69 rates and high polysaccharide content (Robic et al., 2009) making them a stellar for large-scale  
70 production (Gajaria et al., 2017; Jones and Mayfield, 2012).

71 Numerous studies have described the biosynthesis of a wide range of valuable materials such as  
72 biogas, butanol, and ethanol by fermentation of seaweed (Ashokkumar et al., 2017; Leaves and  
73 Based, 2019; Scientific et al., 1983; Wise et al., 1979). However, recently seaweed has been explored

74 as a potential substrate for PHA production. Studies have shown that bacteria accumulated PHA in a  
75 medium containing brown algae (Azizi et al., 2017; Moriya et al., 2020; Muhammad et al., 2020),  
76 red algae (Alkotaini et al., 2016; Bera et al., 2015; Sawant et al., 2018), and green seaweed *Ulva* sp.  
77 (Ghosh et al., 2019). Our research group has demonstrated that the *Ulva* sp. hydrolysate is a promising  
78 feedstock for PHA production using *Haloferax mediterranei* (Ghosh et al., 2019).

79 In the present study, more than one hundred strains of bacteria isolated from green macroalgae  
80 *Ulva* sp. were evaluated for their capability to manufacture PHAs with various supplemented  
81 fermentative substrates found to be in macroalgae, e.g., glucose, fructose, galactose, mannitol,  
82 mannose, arabinose, rhamnose, glucuronic acid, and xylose. A total of thirty-one bacteria found to  
83 produce PHA. Ten strains related to genus *Cobetia*, *Bacillus*, *Pseudoaltermonas*, and *Sulfitobacter*,  
84 which showed high PHA yields among the isolates, were further investigated. The effect of the type  
85 of supplemented sugars on the growth and PHA productivity of the strains was studied. Furthermore,  
86 the effect of bacteria co-culture and mixed substrates on the production of PHA was investigated.  
87 Also, 16S rRNA sequence identification of several isolated bacteria was performed. Finally, the  
88 ability of the strain *Cobetia* 105 to produce PHA on *Ulva* sp. acid hydrolysate, was demonstrated.  
89 This study could contribute to the understanding of the diversity of bacteria, associated with marine  
90 macroalgae, in terms of PHA productivity and bacteria strains.

91

## 92 **Materials and Methods**

### 93 **Chemicals, instruments and media**

94 For bacterial cultivation on plates, Agar powder (2% w/v) (Difco, USA) was dissolved in a medium  
95 with Marine Broth (Beit Dekel, Israel) containing (per L) 19.4 g NaCl, 3.24 g MgSO<sub>4</sub>·7H<sub>2</sub>O, 5.0 g  
96 Peptone, 8.8 g MgCl<sub>2</sub>·6H<sub>2</sub>O, 1.8 g CaCl<sub>2</sub>, 1 g yeast extract, 0.55 g KCl and 0.16 g NaHCO<sub>3</sub> (pH 7.6).  
97 The supplemented sugars (glucose, fructose, galactose, mannitol, mannose, arabinose, rhamnose,  
98 glucuronic acid, and xylose) were purchased from Sigma-Aldrich (Israel). Nile Blue (Sigma-Aldrich,  
99 Israel) for staining of PHA was used for the screening of isolated bacteria. The sugar's solutions were  
100 filtered through a 0.22 μm pore membrane microfilter (CSI, Israel). Bacteria in liquid cultures was  
101 grown in aerobic flask bottles (175 mL) in a shaking incubator.

102

### 103 **Growth of the green macroalga *Ulva* sp**

104 The growth of *Ulva* sp. was carried out by adding 20 gram of fresh *Ulva* sp. in 40 mL cylindrical,  
105 sleeve-like seaweed photobioreactor (MPBR, Polytiv, Israel) (Chemodanov et al., 2017) in a seawater  
106 medium containing 3.7% w/v of dried Red Sea salt (Red Sea Inc, IS), ammonium nitrate (NH<sub>4</sub>NO<sub>3</sub>,  
107 Haifa Chemicals Ltd, Israel) and phosphoric acid (H<sub>3</sub>PO<sub>4</sub>, Haifa Chemicals Ltd, Israel). The final  
108 concentration of nitrogen (N<sub>2</sub>) and phosphorus (P) in the medium were 6.4 g m<sup>-3</sup> and 0.97 g m<sup>-3</sup>,

109 respectively. The pH, temperature and flow rate were controlled as stated in our earlier work  
110 (Chemodanov et al., 2017).

111

### 112 **Acid hydrolysis of the green macroalga *Ulva* sp**

113 *Ulva* sp. was dried at a temperature of 40°C after harvesting. Subsequently, the dried biomass was  
114 crushed with an electric grinder (Grinding machine, Henan Gelgoog Machinery GG9FZ-19) to obtain  
115 fine powdered *Ulva* sp. The acid hydrolysis was performed as described in our previous study (Id et  
116 al., 2020). Briefly, 45 grams of dry powdered *Ulva* sp. were added to 500 mL of sulfuric acid solution  
117 (2% v/v). The sample was autoclaved at 121 °C for 30 minutes. The solution was cooled, and the pH  
118 was adjusted to 6.7 by adding 117 mL of 3M NaOH solution and 80.6 mL of PBS buffer (Phosphate  
119 Buffer Saline). Subsequently, 12.2 mL of Marine Broth was added to the medium to supplement  
120 minerals and nitrogen sources, and the solution was filtered with 0.22 µm syringe-filter (Millipore,  
121 USA).

122

### 123 **Analysis of *Ulva* sp. acid hydrolysate by Ion chromatography**

124

125 The chemical composition of the *Ulva* sp. acid hydrolysate products was determined using high-  
126 pressure ion chromatography (HPIC) via Dionex ICS-5000 (Dionex, Thermo Fischer Scientific, MA,  
127 USA). The acid hydrolysate solution was diluted in ultrapure water to reach a ratio of 1:2. The sample  
128 was then filtered with a 0.22 µm syringe filter (Millipore, USA) and added to HPIC vials (Thermo  
129 Fischer Scientific, USA). The phase flow rate was 0.25 mL/min, and the column temperature was set  
130 to 30°C. The standards used as a reference to identify and quantify the resulted monosaccharides were  
131 fructose, xylose, glucose, galactose, rhamnose and Glucuronic acid (Sigma-Aldrich, Saint-Louis,  
132 USA).

133

### 134 **Isolation of bacterial strains**

135 *Ulva* sp., a green seaweed collected from the Mediterranean Sea, was used as a source of PHA-  
136 producing bacteria. The isolation of bacteria was carried out by three to six isolation rounds, up to  
137 achieving a homogenous single colony, which was detected by binocular (Figure 1). The first  
138 isolation round was done by smearing live algae thalli after it was harvested in the Israeli eastern part  
139 of the Mediterranean Sea or by smearing seawater. The first bacterial isolation round was done on  
140 plates with five different carbon sources with three different concentrations of the agar 0.7, 1 and  
141 1.5% agar. The five media contents were: (1) natural Mediterranean seawater (SW); (2) live *Ulva* sp.  
142 (5 g wet weight) with double-distilled water (DDW); (3) *Ulva* sp. dried at 40°C and was ground with  
143 mortar and pestle, for the medium preparation was taken 1.5% of *Ulva* sp. dry weight (DW) with

144 DDW; (4) marine broth (MB) (Marine Broth 2216, BD Difco), 3.7 g L<sup>-1</sup> in DDW; (5) DDW without  
145 any carbon source. All media were autoclaved and poured into Petri dishes. The subsequent isolation  
146 rounds were done by streak-plating bacteria cultures up to isolate a single colony. All isolation rounds  
147 after the first round were done on MB plates (1.5% agar). Finally, 110 isolated bacteria colonies were  
148 transferred to 2 mL liquid marine broth (3.7 g·L<sup>-1</sup>) and kept for overnight at 32°C in a shaker incubator  
149 (180 RPM, Incu-Shaker Mini, Benchmark Scientific). The bacteria were stored in glycerol (final  
150 concentration of 25%) at -80°C.

## 151

### 152 **Screening of bacteria utilizing different sugars for PHA production**

153 All of 110 bacterial isolates were tested for PHA production using Nile Blue A staining method. The  
154 bacteria isolates were cultivated on agar plates containing MB and the selected sugar (2% w/v) and  
155 incubated for four days at 32°C. Nile Blue A (0.5 µg/mL) was directly added to a rich Marine Broth  
156 agar medium; thus, the bacterial cells were grown in the presence of the dye. Subsequently, the  
157 bacteria were exposed to UV illumination (320 nm) using the ENDURO™ GDS Gel Documentation  
158 System (Labnet International, Inc. Israel). This technique allowed rapid screening of the viable  
159 colonies for PHA production and considered to be a powerful tool for distinguishing between PHA-  
160 negative and PHA-positive strains. The bacteria that have shown a bright white fluorescence on  
161 irradiation with UV light were selected as potential PHA accumulators. The selected bacteria were  
162 repeatedly grown on different sugars in Marine Broth plates, and the accumulation of PHA on each  
163 sugar was also examined by Nile Blue staining. All experiments were carried out in triplicates.

### 164

### 165 **Molecular identification of the isolates**

166 PHA-positive bacteria were genomically identified to the genus level using 16S sequencing profiling.  
167 For strain identification, genomic DNA extraction was performed, a colony of each bacterial strain  
168 was transferred into a 2 mL sterile tube containing distilled water. The samples were then centrifuged  
169 for 3 minutes at 10000 RPM and heated for 10 minutes at 100°C in an Eppendorf Thermomixer C  
170 (Thermo Fisher Scientific, USA) to lyse the bacterial cells. The supernatant of the sample, which  
171 contains the DNA fragments, was obtained, and the cell pellet was discarded. The microbial DNA  
172 was purified using the Exo-sap DNA Clean-Up Kit (Sigma- Aldrich, Israel) using 5 L aliquot of the  
173 supernatant. The 16S rDNA was amplified by PCR using standard protocols (Wang et al., 2011)  
174 based on the primers data shown in Table 1. The PCR product was purified by Exo-sap clean up kit.  
175 Sequencing of 16S rDNA was carried out by TAU genomic unit, and a homology search of the  
176 databases was performed using the BLAST. A phylogenetic tree was constructed using the neighbor-  
177 joining DNA distance algorithm (Saitou and Nei, 1987) using Mega 5. The resultant tree topologies  
178 were evaluated by bootstrap analysis of neighbor-joining data sets based on 100 resamplings.

179

## 180 **Cultivating of PHA-producing isolates in liquid media with different sugars**

181 Starters of the selected PHA-positive bacteria were prepared by adding one bacterial colony into  
182 Marine Broth (MB) medium and were incubated for 18 hours at 37°C. The bacteria starters were  
183 poured into a single sterile bottle. 1.75% of MB media (900 mL) was prepared and autoclaved. The  
184 selected carbon source (2% w/v) was dissolved in the medium and adjusted to afford pH 7. For each  
185 treatment, a sterile glass bottle containing 135 mL of MB media was prepared. Subsequently, 15 mL  
186 of bacteria were added from the bacteria inoculum to the medium (total volume of 150 mL). The  
187 content of the bottles was then appropriately mixed, and the 150 mL solutions were divided to afford  
188 three portions of 50 mL solutions. The cultures were grown under aerobic conditions in a shaking  
189 incubator at 32°C with a rotational speed of 90 rpm for four days. The bacterial growth was examined  
190 by measuring OD 600. The resulting biomass was collected by centrifugation at 4500 g for 30 min in  
191 a swing rotor centrifuge (Rotanta 420R, Hettich Instruments LP, USA), rinsed twice with a saline  
192 solution followed by 15 min centrifugation, dried in an oven at 45°C for 24h until a constant weight  
193 was obtained. The DW biomass and %DW per fermentation volume was calculated. PHAs were  
194 extracted and analyzed by GC-MS and <sup>1</sup>H-NMR. All experiments were carried out in triplicates.

195

## 196 **PHA production by bacterial combinations on sugar mixtures**

197 The best PHA-producing bacteria were chosen to study the effect of bacteria combination and sugar  
198 mixture on PHA production. Starters of the selected PHA-positive bacteria were prepared by adding  
199 one bacterial colony into Marine Broth (MB) medium and were incubated for 18 hours at 37°C  
200 following the previously mentioned procedure. The bacteria starters were poured equally (5 mL each  
201 bacteria) into a sterile bottle. MB media was prepared and autoclaved. The selected carbon source  
202 was added to the media (2% w/v for each sugar type) and adjusted to afford pH 7. For each treatment,  
203 a sterile glass bottle containing 135 mL of MB media was prepared. Subsequently, 15 mL of bacteria  
204 were added from the bacteria inoculum to the media to yield 150 mL of solution. The bottles were  
205 mixed properly, and the 150 mL solutions were divided equally into three 50 mL solutions. The  
206 cultures were grown under aerobic conditions in a shaker (90 rpm) at 32°C for 4 days. The bacterial  
207 growth was examined by measuring OD 600. The resulting biomass was collected by centrifugation  
208 at 4500 g for 30 min in a swing rotor centrifuge (Rotanta 420R, Hettich Instruments LP, USA), rinsed  
209 twice with a saline solution followed by 15 min centrifugation, dried in an oven at 45°C for 24h until  
210 a constant weight was obtained. The DW biomass and %DW per fermentation volume was calculated.  
211 PHAs were extracted and analyzed using GC-MS and <sup>1</sup>H-NMR. All experiments were carried out in  
212 triplicates.

213

#### 214 **PHA production by *Cobetia* 105 on *Ulva* sp. acid hydrolysate**

215 Starters of *Cobetia* isolate no. 105 were prepared by adding one bacterial colony into Marine Broth  
216 (MB) medium and were incubated for 18 hours at 37°C following the procedure mentioned above.  
217 The bacteria starters were poured into a single sterile bottle. The selected carbon source was added  
218 to the *Ulva* sp. hydrolysate media (2% w/v). A sterile glass bottle containing 135 mL of hydrolysate  
219 media was prepared. Subsequently, 15 mL of bacteria were added from the bacteria inoculum to the  
220 media to yield 150 mL of solution. The bottles were then mixed properly, and the 150 mL solutions  
221 were divided equally into three 50 mL solutions. The cultures were grown under aerobic conditions  
222 in a shaker (90 rpm) at 32°C for 4 days. The bacterial growth was examined by measuring OD 600.  
223 The resulting biomass was collected by centrifugation at 4500 g for 30 min in a swing rotor centrifuge  
224 (Rotanta 420R, Hettich Instruments LP, USA), rinsed twice with a saline solution followed by 15  
225 min centrifugation, dried in an oven at 45°C for 24h until a constant weight was obtained. The DW  
226 biomass and %DW per fermentation volume was calculated. PHAs were extracted and analyzed using  
227 GC-MS and <sup>1</sup>H-NMR. All experiments were carried out in triplicates.

228

#### 229 **Characterization and quantification of PHA by GC-MS**

230 PHAs were analyzed after direct acid-catalyzed trans-esterification with methanol of the dried  
231 bacteria (DB). The tested samples of DB (10-30 mg) were added to a mixture of chloroform (1.0 mL),  
232 benzoic acid (1.0 mg, an internal standard, BA), methanol (2.0 mL) and concentrated H<sub>2</sub>SO<sub>4</sub> (0.5  
233 mL). The suspension was heated at 90°C with magnetic stirring for overnight in a closed vial. The  
234 reaction mixture was cooled to room temperature and treated with a cooled saturated NaCl solution  
235 (15 mL) and chloroform (10 mL). Anisole (1.0 mg, an external standard, AN) and 2,4-  
236 dimethylanisole (1.0 mg, an external standard, DMA) were added to the mixture. The organic phase  
237 was washed twice with water, separated, dried over anhydrous sodium sulfate and concentrated under  
238 vacuum to obtain 1 mL solution. GC-MS was used to analyze the PHA methanolysis products and  
239 their chemical composition. GC-MS analysis was performed using a Thermo Trace 1310 GC,  
240 equipped with a TG-SQC GC capillary column (15 m, 0.25 mm i.d., 0.25 µm film thickness) and a  
241 mass spectrometer ISQ LT as the detector. The carrier gas was helium at a flow rate of 1.2 mL/min.  
242 The column temperature was initially 50°C for 1 min, then gradually increased to 200°C at 10°C/min,  
243 and finally increased to 285°C at 20°C/min. For GC-MS detection, an electron ionization system was  
244 used with ionization energy of 70 eV. The samples were diluted 1:1000 (v/v) with ultra-pure hexane,  
245 and 1.0 µL of the diluted samples (8 ng/1 µL) was injected automatically in split mode. Injector and  
246 detector temperatures were set at 250°C. All experiments were carried out in triplicates.

247

## 248 **<sup>1</sup>H NMR analysis**

249 All samples were dissolved in deuterated CDCl<sub>3</sub> prior analysis (5 mg/mL). Each sample was shaken  
250 vigorously till complete dissolution was achieved, and about 0.5 mL of it was transferred into an  
251 NMR tube for analysis and run <sup>1</sup>H-NMR with Pulse Program zg30 on Bruker AVANCE III 500  
252 MHz NMR Spectrometer with 5 mm PABBO-BB probe and Topspin 3.0 software.

253

## 254 **Statistical Analysis**

255 The results were statistically analyzed using Excel and GraphPad prism 8 for data management and  
256 quantitative analysis. One-way and two-way ANOVA using Tukey and Holm-Sidak's multiple  
257 comparison tests were performed for analyzing standard deviation, means and statistical significance  
258 for PHA yield and DCW concentration.

259

## 260 **Results**

### 261 **PHA accumulation by *Ulva* sp. associated bacterial strains utilizing different sugars**

262 A total of 110 bacteria were isolated from *Ulva* sp. and screened for PHA production by using  
263 Nile Blue A staining method. All positive-PHA strains exhibited a white fluorescent emission on agar  
264 plates containing different sugars under UV light. For example, Figure 2 shows the diversity of PHA  
265 production of *Cobetia* isolate no. 104 that produces PHA mainly in mannitol, fructose, galactose, and  
266 glucose, while no PHA was observed with *Cobetia* isolate no. 104 in the presence of other sugars. It  
267 is important to emphasize that all tested bacteria did not produce PHA when grown on MB alone as  
268 a control. Based on fluorescence staining, 28 bacteria were found to accumulate PHA to a different  
269 extent in the presence of glucose, fructose, mannitol, and galactose. The sugar substrate with the  
270 highest number of bacteria that produce PHA is glucose with 27 different strains, followed by fructose  
271 with 24 strains, then mannitol and galactose with 17 strains (Table 2).

272

### 273 **PHA-Producing Bacteria Identification Using 16S rRNA Gene and Phylogenetic Analysis**

274 Molecular identification of the isolates was carried out by the sequencing of 16S rRNA gene.  
275 Amplification of bacterial genomic DNA by primers yielded 1400-1500 bp fragments (Figure 3). The  
276 bacteria were found to be within the genus of *Cobetia*, *Bacillus*, *Sulfitobacter* and *Pseudoaltermonas*.  
277 The phylogenetic relationship among the *Cobetia* isolates is provided in Figure 4. *Cobetia* no. 65,  
278 *Cobetia* no. 92, and *Cobetia* no. 104 were found to have 16S rRNA similarity and close relation to  
279 *Cobetia amphilecti*. *Cobetia* no. 105, *Cobetia* no. 75, *Cobetia* no. 76. On the other hand, *Cobetia* no.  
280 107 were found to have a close genomic characterization and likely related to both *C. pacifica* and *C.*  
281 *litoralis*. Besides, *Cobetia* isolates found to have a strong evolutionary relationship with *Halomonas*,



282 as was suggested by Arahal et al. (Arahal et al., 2002). Most of these bacteria are PHA producers.  
283 *Bacillus* isolate no. 3, also found to have a close genomic relationship to *B. cereus*, *B. mobilis*, *B.*  
284 *pacificus* and *B. thuringiensis* with 98% identity. Two or more distinct *Bacillus* species may possess  
285 identical 16S rDNA sequences (Ash et al., 1991; IJsselmuiden and Faden, 1992). Additional  
286 taxonomic studies on the isolates showed that isolate no. 48 has a genomic relationship to  
287 *Sulfitobacter* sp. and isolate no. 71 has a genomic relationship to *Pseudoaltermonas* sp.

288

289 **Chemical structure and amount of the produced P(3HB) by *Cobetia*, *Bacillus*,**  
290 ***Pseudoaltermonas* and *Sulfitobacter***

291 The results of the produced methylated ester derivatives obtained by acid methanolysis of PHA  
292 showed mainly two large peaks corresponding to methyl-3-hydroxybutyrate (M3HB,  $R_t=3.15$  min),  
293 and methyl-3-methoxy-butanoate (M3MB,  $R_t=3.97$  min), and a small peak corresponding to levulinic  
294 acid (LA,  $R_t=5.89$  min) in addition to our three standards (anisole-ANS  $R_t=4.67$  min; methyl  
295 benzoate-MB  $R_t=7.03$  min and 2,4-dimethylanisole-DMA  $R_t=7.49$  min) as shown in a typical GC-  
296 MS chromatogram in Figure 5. The presence of M3HB and M3MB monomers indicated that the PHA  
297 polymer is mainly P(3HB).

298 The dry cell weight (DCW,  $\text{g L}^{-1}$ ), P(3HB) content (%DCW), and P(3HB) yield ( $\text{mg L}^{-1}$ ) values  
299 obtained with different *Ulva* sp. associated bacteria grown on different supplemented sugars are  
300 presented in Table 3. Cell growth of  $1.14 \text{ g L}^{-1}$  and  $1.96 \text{ g L}^{-1}$ , and P(3HB) content yield of 10.03%  
301 and 13.97% were obtained when *Bacillus* was grown in a medium containing fructose and glucose,  
302 respectively. *Sulfitobacter* produced 7.73% of P(3HB) and  $2.54 \text{ g L}^{-1}$  of DCW when it was grown in  
303 medium containing mannitol. A DCW of  $6.63 \text{ g L}^{-1}$  and  $1.06 \text{ g L}^{-1}$  and a P(3HB) production of 17.11%  
304 and 11.83% were obtained with *Cobetia* isolate no. 65 grown in medium containing mannitol and  
305 galactose, respectively. *Pseudoaltermonas* produced 7.46% of P(3HB) with DCW of  $2.54 \text{ g L}^{-1}$  when  
306 grown in medium containing fructose, while no PHA was produced on other sugars. The highest  
307 DCW of *Cobetia* isolate no. 75 was obtained when it was grown in a medium containing mannitol or  
308 glucose ( $4.72 \text{ g L}^{-1}$  and  $3.72 \text{ g L}^{-1}$ , respectively), and the highest P(3HB) production was achieved  
309 with mannitol (18.56%) and glucose (20.91%). *Cobetia* isolate no. 104 produced the highest amount  
310 of P(3HB) in fructose (23.39%). *Cobetia* isolate no. 105 produced 61% of P(3HB) in mannitol with  
311  $4.58 \text{ g L}^{-1}$  of DCW. *Cobetia* isolate no. 107 produced the highest P(3HB) amount when it was grown  
312 in fructose (27.45%) with a DCW of  $3.53 \text{ g L}^{-1}$ . The highest P(3HB) amount using *Cobetia* isolate  
313 no. 92 was obtained in mannitol (8.91%) with  $4.5 \text{ g L}^{-1}$  of DCW.

314 *Cobetia* isolate no. 75, *Cobetia* isolate no. 92, *Cobetia* isolate no. 104 and *Cobetia* isolate no. 107  
315 produce P(3HB) mainly on galactose, mannitol, fructose, and glucose. While *Cobetia* isolate no. 65  
316 produce P(3HB) on galactose and mannitol. *Cobetia* isolate no. 105 produce P(3HB) mainly on

317 mannitol and fructose, and *Cobetia* isolate no. 76 produce P(3HB) mainly on fructose, glucose, and  
318 mannose.

319

### 320 **Effect of bacterial combination and sugar mixtures on the PHA production**

321 Mixed culture systems were shown to produce large amounts of PHAs in a wide range of low-cost  
322 substrates (Shalin et al., 2014). We have grown the best PHA-producers on three sugar substrates  
323 with a total concentration of 2% w/v. *Cobetia* isolate no. 107, *Cobetia* isolate no. 104, *Cobetia* isolate  
324 no. 92, *Cobetia* isolate no. 65, *Cobetia* isolate no. 75 were selected to study the effect of bacteria  
325 combinations on bacteria growth and PHA production. The selected sugars were glucose, fructose  
326 and mannitol. The results in Figure 6 present the biomass amount, PHA amount and yield of all  
327 *Cobetia* strains on a mixed culture of glucose, fructose and mannitol. The highest biomass, PHA  
328 amount and PHA yield were obtained by *Cobetia* isolate no. 105 with 2.03 g·L<sup>-1</sup>, 712 mg·L<sup>-1</sup> and  
329 35.1% respectively. The results presented in Table 4 show that a mixed culture of different species of  
330 bacteria afforded relatively low DCW and P(3HB) yields. For example, *Cobetia* isolate no. 107 alone  
331 and *Cobetia* isolate no. 104 alone produced 27.45% w/w and 23.29% w/w of P(3HB) in fructose,  
332 respectively. However, a mixed culture of these two bacteria in fructose afforded only 10.05% of  
333 P(3HB). A similar result was observed when a bacterial combination of *Cobetia* isolate no. 65, isolate  
334 no. 75, and isolate no. 105 in mannitol was used. A yield of 11.61% of P(3HB) was obtained for the  
335 mixed bacteria compared to 17.11% for *Cobetia* isolate no. 65, 18.56% for *Cobetia* isolate no. 75,  
336 and 61% for *Cobetia* isolate no. 105. Notably, additional valuable fine chemicals were also exhibited  
337 in a very low amount, such as hexane-2,5-dione and levulinic acid.

338

### 339 **PHA production by *Cobetia* isolate no. 105 on *Ulva* sp. hydrolysate**

340 A mixture of monosaccharides was obtained by acid hydrolysis of *Ulva* sp. which were quantified  
341 using HPIC (Table 5). The hydrolysate composed of glucose (16.1±0.8 mg/g DW), rhamnose  
342 (6.2±0.45 mg/g DW), fructose (2.8±0.41 mg/g DW), xylose (1.6±0.22 mg/g DW), galactose  
343 (1.0±0.11 mg/g DW) and glucuronic acid (1.3±0.11 mg/g DW). PHA production by *Cobetia* no. 105  
344 on *Ulva* sp. hydrolysate was investigated (Figure 7). The results showed a biomass concentration of  
345 1.4 ± 0.12 g·L<sup>-1</sup> and PHA yield (% DCW) of 12% (w/w). The <sup>1</sup>H-NMR spectrums of the PHA  
346 extracted from *Cobetia* isolate no. 105 grown on *Ulva* hydrolysate in comparison to that grown on  
347 sugar mixture are shown in Figure 8 and 9. The <sup>1</sup>H-NMR spectral data matched with the <sup>1</sup>H-NMR  
348 spectrum of P(3HBV) acquired by (Bloembergen et al., 1989). From the calculated peak integration,  
349 it can be concluded that the PHA produced from *Cobetia* isolate no. 105 grown on sugar mixture (i.e.  
350 glucose, fructose and mannitol) contains mainly 3HB with 0.94 mole% 3HV while 3.29 mole% 3HV  
351 was obtained when *Cobetia* isolate no. 105 was grown on *Ulva* sp. acid hydrolysate.

## 352 Discussion

353 We have successfully isolated bacteria strains from the green seaweed *Ulva sp.* that found to  
354 accumulate P(3HB) on various sugars found in seaweed. Taxonomic studies and 16S rDNA gene  
355 sequence analysis revealed that these bacteria are phylogenetically related to species of the genus  
356 *Cobetia*, *Bacillus*, *Sulfitobacter* and *Pseudoaltermonas*. *Bacillus* isolate no. 3, found to have a close  
357 genomic relationship to *B. cereus*, *B. mobilis*, *B. pacificus* and *B. thuringiensis* with 98% identity.  
358 Isolate no. 48 found to have a close relation to *Sulfitobacter sp.* with 98% identity. Isolate no. 71  
359 found to have a close relation with *Pseudoaltermonas sp.* with 98.52% identity. The closest species  
360 of *Cobetia* are *C. amphiletci* 46-2 with 100% identity, *C. litoralis* KMM 3880 with 99.91%, *C. marina*  
361 and *C. pacifica* with 99.57%.

362 The fermentation process was carried out using different bacteria isolates and different sugars for  
363 PHA production. Among all the isolates, the highest production of PHA was obtained by *Cobetia*  
364 isolate no. 105 on mannitol with 61% of P(3HB), *Cobetia* isolate no. 107 on fructose with 27.5%,  
365 *Cobetia* isolate no. 104 on fructose with 23.3%, *Cobetia* isolate no. 75 on glucose with 20.9% and  
366 *Cobetia* isolate no. 65 on mannitol with 17.1%.

367 *Cobetia* strains found to assimilate various carbon sources, such as fructose, glucose, mannitol  
368 and galactose, and produce P(3HB) with high productivity. *Cobetia* was classified originally as  
369 *Arthrobacter marinus* by (Cobet et al., 1971), then *Deleya marina* by (BAUMANN et al., 1983) and  
370 *Halomonas marina* by (Dobson and Franzmann, 1996). The genus *Cobetia* contains mainly two well-  
371 known strains, *Cobetia marina* (Arahal et al., 2002), and *Cobetia crustatorum* (Kim et al., 2010).

372 Several studies were conducted on microbial species genetically related to the *Halomonas* or  
373 *Cobetia* genus as PHA-producers such as *Cobetia marina*, *Halomonas boliviensis* LC1, *Halomonas*  
374 *elongate* DSM 2581, *Halomonas salina* and *Halomonas sp.TD01* (Mothes et al., 2008; Quillaguamán  
375 et al., 2005; Tao et al., 2017).

376 Among all *Cobetia* strains reported in this study, *Cobetia* no. 105 which was identified as *C.*  
377 *amphiletci* showed the highest P(3BH) yield; 61% w/w when grown on mannitol and 12% w/w on  
378 *Ulva* acid hydrolysate as a sole carbon source. Very recently, Moriya et al. (2020) have reported the  
379 production of PHB (13.5%) by *Cobetia* strain (5-11-6-3) in a medium containing crushed waste  
380 *Laminaria sp.*, (brown seaweed). Furthermore, they have used alginate as a substrate for *Cobetia*  
381 strain 5-11-6-3 which yielded 62.1% of PHB with a content of 3.11 g L<sup>-1</sup>.

382 Wang et al. (2010) have evaluated the content of P(3HB) by *Pseudoaltermonas sp.* SM9913 when  
383 was grown on glucose, decanoate and olive oil. The strain revealed P(3HB) accumulation of 3.10,  
384 1.89, 2.57% of the cell dry weight when glucose, decanoate and olive oil were provided as a carbon  
385 source, respectively (Wang et al., 2010). In our hands, P(3HB) production up to 7.46% (w/w) was  
386 obtained by *Pseudoaltermonas* isolate no. 71 on fructose. Mereuta et al. reported for the first time the

387 production of P(3HB) by *Sulfitobacter* genus, which was isolated from the black sea (Mereuta et al.,  
388 2018).

389 The P(3HB) productivity reported for mixed cultures were found to be lower than the productivity  
390 of pure cultures (Serafim et al., 2008). The maximum cell concentration reported for aerobic dynamic  
391 feeding (ADF) operated systems was 6.1 gL<sup>-1</sup> (Dionisi et al., 2006), which is much lower than those  
392 obtained by pure cultures, usually above 80 gL<sup>-1</sup> (Lee et al., 1999). The reason for this result is the  
393 apparent difficulty in reaching high biomass concentrations in the mixed-culture process (Oehmen et  
394 al., 2014), probably due to bacterial competition on the carbon source. Many studies have  
395 demonstrated the production of P(3HB) from various marine bacteria (Mostafa et al., 2020a, 2020b;  
396 Pu et al., 2020). In this study, some bacteria isolates found to produce P(3HBV).

397

## 398 **Conclusions**

399 In this study, we succeeded in isolating different bacteria strains, including P(3HB) and P(3HBV)-  
400 producing bacteria associated with seaweed *Ulva* sp. designated *C. amphiletci*, *Sulfitobacter* and  
401 *Pseudo-altermonas* from various sugars. The selection of a suitable substrate is an important factor  
402 for improving microbial PHA production yield, composition and properties. Based on our findings,  
403 we recommend conducting large-scale assays and evaluating the industrial production of P(3HB)  
404 using these strains in green seaweed biorefineries.

405

## 406 **Conflict of interest**

407 The authors declare no conflict of interest.

408

## 409 **Authors contributions**

410 A.G. and M.G. conceived the idea of the study. R.G., M.P. and A.G. designed the research  
411 experiments. M.P. isolated the bacteria from the seaweed. R.G. performed the experiments and  
412 analysed the results. J.S. and M.P. helped with molecular identification. R.U. helped with GC-MS  
413 analysis. R.G. and A.G. wrote the manuscript.

414

## 415 **Acknowledgement**

416 R.G. thanks the TRDC-TAU collaborative research grant, the Arianne de Rothchild Women's  
417 Doctoral Program Scholarship, and the Lewis and Martin Whitman Scholarship for Arab students for  
418 financial support of this work. The authors thank The Aaron Frenkel Air Pollution Initiative at Tel  
419 Aviv University for financial support.

420

## 421 **References**

- 422 Alkotaini, B., Koo, H., Kim, B.S., 2016. Production of polyhydroxyalkanoates by batch and fed-  
423 batch cultivations of *Bacillus megaterium* from acid-treated red algae 33, 1669–1673.  
424 <https://doi.org/10.1007/s11814-015-0293-6>
- 425 Arahal, D.R., Castillo, A.M., Ludwig, W., Schleifer, K.H., Ventosa, A., 2002. Proposal of *Cobetia*  
426 *marina* gen. nov., comb. nov., within the family Halomonadaceae, to include the species  
427 *Halomonas marina*. *Syst. Appl. Microbiol.* 25, 207–211. [https://doi.org/10.1078/0723-2020-](https://doi.org/10.1078/0723-2020-00113)  
428 00113
- 429 Ash, C., Farrow, J.A.E., Dorsch, M., Stackebrandt, E., Collins, M.D., 1991. Comparative analysis  
430 of *Bacillus anthracis*, *Bacillus cereus*, and related species on the basis of reverse transcriptase  
431 sequencing of 16S rRNA. *Int. J. Syst. Bacteriol.* 41, 343–346.  
432 <https://doi.org/10.1099/00207713-41-3-343>
- 433 Ashokkumar, V., Razman, M., Salam, Z., Sivakumar, P., Tung, C., Elumalai, S., Suresh, V., Nasir,  
434 F., 2017. Production of liquid biofuels ( biodiesel and bioethanol ) from brown marine  
435 macroalgae *Padina tetrastratica*. *Energy Convers. Manag.* 135, 351–361.  
436 <https://doi.org/10.1016/j.enconman.2016.12.054>
- 437 Azizi, N., Najafpour, G., Younesi, H., 2017. International Journal of Biological Macromolecules  
438 Acid pretreatment and enzymatic saccharification of brown seaweed for polyhydroxybutyrate (   
439 PHB ) production using *Cupriavidus necator*. *Int. J. Biol. Macromol.* 101, 1029–1040.  
440 <https://doi.org/10.1016/j.ijbiomac.2017.03.184>
- 441 BAUMANN, L., BOWDITCH, R.D., BAUMANN, P., 1983. Description of *Deleya* gen. nov.  
442 Created to Accommodate the Marine Species *Alcaligenes aestus*, *A. pacificus*, *A. cupidus*, *A.*  
443 *venustus*, and *Pseudomonas marina*. *Int. J. Syst. Bacteriol.* 33, 793–802.  
444 <https://doi.org/10.1099/00207713-33-4-793>
- 445 Bera, A., Dubey, S., Bhayani, K., Mondal, D., Mishra, S., Ghosh, P.K., 2015. International Journal  
446 of Biological Macromolecules Microbial synthesis of polyhydroxyalkanoate using seaweed-  
447 derived crude levulinic acid as co-nutrient. *Int. J. Biol. Macromol.* 72, 487–494.  
448 <https://doi.org/10.1016/j.ijbiomac.2014.08.037>
- 449 Bloembergen, S., Holden, D.A., Bluhm, T.L., Hamer, G.K., Marchessault, R.H., 1989.  
450 Stereoregularity in Synthetic 0-Hydroxybutyrate and 1656–1663.  
451 <https://doi.org/10.1021/ma00194a027>
- 452 Chemodanov, A., Robin, A., Golberg, A., 2017. Bioresource Technology Design of marine  
453 macroalgae photobioreactor integrated into building to support seagriculture for biorefinery  
454 and bioeconomy. *Bioresour. Technol.* 241, 1084–1093.  
455 <https://doi.org/10.1016/j.biortech.2017.06.061>

- 456 Cobet, A.B., Jones, G.E., Albright, J., Simon, H., Wirsén, C., 1971. The effect of nickel on a marine  
457 bacterium: fine structure of *Arthrobacter marinus*. *J. Gen. Microbiol.* 66, 185–196.  
458 <https://doi.org/10.1099/00221287-66-2-185>
- 459 Dionisi, D., Majone, M., Vallini, G., Di Gregorio, S., Beccari, M., 2006. Effect of the applied  
460 organic load rate on biodegradable polymer production by mixed microbial cultures in a  
461 sequencing batch reactor. *Biotechnol. Bioeng.* 93, 76–88. <https://doi.org/10.1002/bit.20683>
- 462 Dobson, S.J., Franzmann, P.D., 1996. Unification of the genera *Deleya* (Baumann et al. 1983),  
463 *Halomonas* (Vreeland et al. 1980), and *Halovibrio* (Fendrich 1988) and the species *Paracoccus*  
464 *halodenitrificans* (Robinson and Gibbons 1952) into a single genus, *Halomonas*, and  
465 placement of the genus *Zy.* *Int. J. Syst. Bacteriol.* 46, 550–558.  
466 <https://doi.org/10.1099/00207713-46-2-550>
- 467 Gajaria, T.K., Suthar, P., Baghel, R.S., Balar, N.B., Sharnagat, P., Mantri, V.A., Reddy, C.R.K.,  
468 2017. Integration of protein extraction with a stream of byproducts from marine macroalgae: A  
469 model forms the basis for marine bioeconomy. *Bioresour. Technol.* 243, 867–873.  
470 <https://doi.org/10.1016/j.biortech.2017.06.149>
- 471 Ghosh, S., Gnaim, R., Greiserman, S., Fadeev, L., Gozin, M., Golberg, A., 2019. Macroalgal  
472 biomass subcritical hydrolysates for the production of polyhydroxyalkanoate (PHA) by  
473 *Haloferax mediterranei*. *Bioresour. Technol.* 271, 166–173.  
474 <https://doi.org/10.1016/j.biortech.2018.09.108>
- 475 Grigore, M.E., Grigorescu, R.M., Iancu, L., Ion, R.M., Zaharia, C., Andrei, E.R., 2019. Methods of  
476 synthesis, properties and biomedical applications of polyhydroxyalkanoates: a review. *J.*  
477 *Biomater. Sci. Polym. Ed.* 30, 695–712. <https://doi.org/10.1080/09205063.2019.1605866>
- 478 Id, E.V., Gillis, A., Polikovskiy, M., Bender, B., Golberg, A., Yakhini, Z., 2020. Distributed flux  
479 balance analysis simulations of serial biomass fermentation by two organisms 1–17.  
480 <https://doi.org/10.1371/journal.pone.0227363>
- 481 IJsselmuiden, C.B., Faden, R.R., 1992. *The New England Journal of Medicine* Downloaded from  
482 [nejm.org](http://nejm.org) on January 31, 2011. For personal use only. No other uses without permission.  
483 Copyright © 1992 Massachusetts Medical Society. All rights reserved. 326.
- 484 Jones, C.S., Mayfield, S.P., 2012. Algae biofuels: Versatility for the future of bioenergy. *Curr.*  
485 *Opin. Biotechnol.* 23, 346–351. <https://doi.org/10.1016/j.copbio.2011.10.013>
- 486 Kasan, N.A., Said, S.M., Ghazali, N.A., 2015. Beneficial Microorganisms in Agriculture,  
487 Aquaculture and Other Areas. <https://doi.org/10.1007/978-3-319-23183-9>
- 488 Kim, M.S., Roh, S.W., Bae, J.W., 2010. *Cobetia crustatorum* sp. nov., a novel slightly halophilic  
489 bacterium isolated from traditional fermented seafood in Korea. *Int. J. Syst. Evol. Microbiol.*  
490 60, 620–626. <https://doi.org/10.1099/ijs.0.008847-0>

- 491 Kourmentza, C., Plácido, J., Venetsaneas, N., Burniol-Figols, A., Varrone, C., Gavala, H.N., Reis,  
492 M.A.M., 2017. Recent advances and challenges towards sustainable polyhydroxyalkanoate  
493 (PHA) production. *Bioengineering* 4, 1–43. <https://doi.org/10.3390/bioengineering4020055>
- 494 Leaves, N., Based, E., 2019. com Neem Leaves Extract Based Seaweed Bio-degradable Composite  
495 Films with Excellent Antimicrobial Activity for Sustainable Packaging Material 14, 700–713.
- 496 Li, Z., Yang, J., Loh, X.J., 2016. Polyhydroxyalkanoates: Opening doors for a sustainable future.  
497 *NPG Asia Mater.* 8, e265-20. <https://doi.org/10.1038/am.2016.48>
- 498 Mereuta, I., Chiciudean, I., Lascu, I., Avramescu, S.M., Stoica, I., Tanase, A.M., 2018.  
499 Polyhydroxyalkanoate production potential of Black Sea new bacterial isolates. *J. Biotechnol.*  
500 280, S46–S47. <https://doi.org/10.1016/j.jbiotec.2018.06.148>
- 501 Moriya, H., Takita, Y., Matsumoto, A., Yamahata, Y., Nishimukai, M., Miyazaki, M., Shimoi, H.,  
502 Kawai, S.J., Yamada, M., 2020. Cobetia sp. Bacteria, Which Are Capable of Utilizing  
503 Alginate or Waste Laminaria sp. for Poly(3-Hydroxybutyrate) Synthesis, Isolated From a  
504 Marine Environment. *Front. Bioeng. Biotechnol.* 8. <https://doi.org/10.3389/fbioe.2020.00974>
- 505 Mostafa, Y.S., Alrumman, S.A., Alamri, S.A., Otaif, K.A., Mostafa, M.S., Alfaify, A.M., 2020a.  
506 Bioplastic (poly-3-hydroxybutyrate) production by the marine bacterium *Pseudodonghicola*  
507 *xiamenensis* through date syrup valorization and structural assessment of the biopolymer. *Sci.*  
508 *Rep.* 10, 1–13. <https://doi.org/10.1038/s41598-020-65858-5>
- 509 Mostafa, Y.S., Alrumman, S.A., Otaif, K.A., Alamri, S.A., Mostafa, M.S., Sahlabji, T., 2020b.  
510 Production and characterization of bioplastic by polyhydroxybutyrate accumulating  
511 *Erythrobacter aquimaris* isolated from mangrove rhizosphere. *Molecules* 25.  
512 <https://doi.org/10.3390/molecules25010179>
- 513 Mothes, G., Schubert, T., Harms, H., Maskow, T., 2008. Biotechnological coproduction of  
514 compatible solutes and polyhydroxyalkanoates using the Genus *Halomonas*. *Eng. Life Sci.* 8,  
515 658–662. <https://doi.org/10.1002/elsc.200800097>
- 516 Możejko-Ciesielska, J., Kiewisz, R., 2016. Bacterial polyhydroxyalkanoates: Still fabulous?  
517 *Microbiol. Res.* 192, 271–282. <https://doi.org/10.1016/j.micres.2016.07.010>
- 518 Muhammad, M., Aloui, H., Khomlaem, C., Hou, C.T., Soo, B., 2020. Biocatalysis and Agricultural  
519 Biotechnology Production of polyhydroxyalkanoates and carotenoids through cultivation of  
520 different bacterial strains using brown algae hydrolysate as a carbon source. *Biocatal. Agric.*  
521 *Biotechnol.* 30, 101852. <https://doi.org/10.1016/j.bcab.2020.101852>
- 522 Muhammadi, Shabina, Afzal, M., Hameed, S., 2015. Bacterial polyhydroxyalkanoates-eco-friendly  
523 next generation plastic: Production, biocompatibility, biodegradation, physical properties and  
524 applications. *Green Chem. Lett. Rev.* 8, 56–77.  
525 <https://doi.org/10.1080/17518253.2015.1109715>

- 526 Oehmen, A., Pinto, F. V., Silva, V., Albuquerque, M.G.E., Reis, M.A.M., 2014. The impact of pH  
527 control on the volumetric productivity of mixed culture PHA production from fermented  
528 molasses. *Eng. Life Sci.* 14, 143–152. <https://doi.org/10.1002/elsc.201200220>
- 529 Pu, N., Hu, P., Shi, L.L., Li, Z.J., 2020. Microbial production of poly(3-hydroxybutyrate) from  
530 volatile fatty acids using the marine bacterium *Neptunomonas concharum*. *Bioresour. Technol.*  
531 *Reports* 11, 100439. <https://doi.org/10.1016/j.biteb.2020.100439>
- 532 Quillaguamán, J., Hashim, S., Bento, F., Mattiasson, B., Hatti-Kaul, R., 2005. Poly( $\beta$ -  
533 hydroxybutyrate) production by a moderate halophile, *Halomonas boliviensis* LC1 using  
534 starch hydrolysate as substrate. *J. Appl. Microbiol.* 99, 151–157.  
535 <https://doi.org/10.1111/j.1365-2672.2005.02589.x>
- 536 Robic, A., Sassi, J.F., Dion, P., Lerat, Y., Lahaye, M., 2009. Seasonal variability of  
537 physicochemical and rheological properties of ulvan in two ulva species (chlorophyta) from  
538 the Brittany coast1. *J. Phycol.* 45, 962–973. <https://doi.org/10.1111/j.1529-8817.2009.00699.x>
- 539 Sagong, H.Y., Son, H.F., Choi, S.Y., Lee, S.Y., Kim, K.J., 2018. Structural Insights into  
540 Polyhydroxyalkanoates Biosynthesis. *Trends Biochem. Sci.* 43, 790–805.  
541 <https://doi.org/10.1016/j.tibs.2018.08.005>
- 542 Saitou, N., Nei, M., 1987. The neighbor-joining method: a new method for reconstructing  
543 phylogenetic trees. *Mol. Biol. Evol.* 4, 406–425.  
544 <https://doi.org/10.1093/oxfordjournals.molbev.a040454>
- 545 Sangkharak, K., Prasertsan, P., 2012. Screening and identification of polyhydroxyalkanoates  
546 producing bacteria and biochemical characterization of their possible application. *J. Gen. Appl.*  
547 *Microbiol.* 58, 173–182. <https://doi.org/10.2323/jgam.58.173>
- 548 Sawant, S.S., Salunke, B.K., Kim, B.S., 2018. Consolidated bioprocessing for production of  
549 polyhydroxyalkanotes from red algae *Gelidium amansii*. *Int. J. Biol. Macromol.* 109, 1012–  
550 1018. <https://doi.org/10.1016/j.ijbiomac.2017.11.084>
- 551 Scientific, E., Company, P., Hansson, G., 1983. Methane production from marine, green macro-  
552 algae 8, 185–194.
- 553 Shalin, T., Sindhu, R., Binod, P., Soccol, C.R., Pandey, A., 2014. Mixed cultures fermentation for  
554 the production of poly-  $\beta$ - hydroxybutyrate. *Brazilian Arch. Biol. Technol.* 57, 644–652.  
555 <https://doi.org/10.1590/S1516-89132013005000016>
- 556 Tao, W., Lv, L., Chen, G.Q., 2017. Engineering *Halomonas* species TD01 for enhanced  
557 polyhydroxyalkanoates synthesis via CRISPRi. *Microb. Cell Fact.* 16, 1–10.  
558 <https://doi.org/10.1186/s12934-017-0655-3>
- 559 Wang, Q., Zhang, H., Chen, Q., Chen, X., Zhang, Y., Qi, Q., 2010. A marine bacterium  
560 accumulates polyhydroxyalkanoate consisting of mainly 3-hydroxydodecanoate and 3-



- 561 hydroxydecanoate. *World J. Microbiol. Biotechnol.* 26, 1149–1153.  
562 <https://doi.org/10.1007/s11274-009-0282-1>
- 563 Wang, T.Y., Wang, L., Zhang, J.H., Dong, W.H., 2011. A simplified universal genomic DNA  
564 extraction protocol suitable for PCR. *Genet. Mol. Res.* 10, 519–525.  
565 <https://doi.org/10.4238/vol10-1gmr1055>
- 566 Wei, N., Quarterman, J., Jin, Y.S., 2013. Marine macroalgae: An untapped resource for producing  
567 fuels and chemicals. *Trends Biotechnol.* 31, 70–77.  
568 <https://doi.org/10.1016/j.tibtech.2012.10.009>
- 569 Wise, D.L., Augenstein, D.C., Company, D.R.D., Oceanographic, W.H., 1979. METHANE  
570 FERMENTATION OF AQUATIC BIOMASS 4, 217–237.  
571  
572  
573

574

## Tables

575

576 **Table 1.** PCR primers and conditions used for bacteria identification

577

| Organism Name           | Primer Type | Sequence                  | Start | Length | Tm   | GC % | Amplicon |
|-------------------------|-------------|---------------------------|-------|--------|------|------|----------|
| <i>Sulfitobacter</i>    | Forward-1   | TAATACCGCATACGCCCTTC      | 120   | 20     | 54.6 | 50.0 | 880      |
|                         | Reverse-1   | ATCACGGGCAGTTTCCTTAG      | 1000  | 20     | 54.8 | 50.0 |          |
|                         | Forward-2   | AACGCGCAGAACCTTACC        | 887   | 18     | 55.7 | 55.6 | 253      |
|                         | Reverse-2   | ATTGTAGCACGTGTGTAGCC      | 1140  | 20     | 55.2 | 50.0 |          |
|                         | Forward-3   | AGGAAACTGCCCGTGATAAG      | 1060  | 20     | 54.8 | 50.0 | 960      |
|                         | Reverse-3   | GGCTACCTTGTTACGACTTCA     | 1400  | 21     | 54.4 | 47.6 |          |
| <i>Pseudoaltermonas</i> | Forward-1   | GTCATGAATCACTCCGTGGTAA    | 30    | 22     | 54.6 | 45.5 | 808      |
|                         | Reverse-1   | GAGTGTGATAGAGGGTGGTAGA    | 838   | 22     | 55.0 | 50.0 |          |
|                         | Forward-2   | CTCTGTATGTCAAGTGTAGGTAAGG | 500   | 25     | 54.4 | 44.0 | 770      |
|                         | Reverse-2   | ATTGGCCCAAGTGGGATTAG      | 1270  | 20     | 55.0 | 50.0 |          |
|                         | Forward-3   | GTACGCTTACGCCAGTAAT       | 930   | 21     | 55.0 | 47.6 | 520      |
|                         | Reverse-3   | GTCGAGCGGTAACAGAAAGTAG    | 1450  | 22     | 55.1 | 50.0 |          |
| <i>Cobetia</i>          | Forward-1   | AACTCAGGCTAATACCGCATAAC   | 150   | 22     | 54.5 | 45.5 | 530      |
|                         | Reverse-1   | CTGGTATTCCTCCCGATCTCTA    | 700   | 22     | 54.9 | 50.0 |          |
|                         | Forward-2   | GGAAGAACGCTTCGGGATTA      | 398   | 20     | 54.7 | 50.0 | 702      |
|                         | Reverse-2   | CTCCTTAGAGTTCCTCCGACATTAC | 1100  | 23     | 54.5 | 47.8 |          |
|                         | Forward-3   | CGGAATTACTGGGCGTAAAG      | 495   | 20     | 53.5 | 50.0 | 925      |
|                         | Reverse-3   | CCCTAGGGCTACCTTGTT        | 1420  | 18     | 53.6 | 55.6 |          |
| <i>Alteromonas</i>      | Forward     | TCAACCTGGGATGGTCATTTAG    | 589   | 22     | 62.0 | 45.5 | 765      |
|                         | Reverse     | GGAACGTATTCACCGCAGTAT     | 1353  | 21     | 62.0 | 47.6 |          |
| <i>Bacillus</i>         | Forward-1   | ATCCTGGCTCAGGACGAA        | 16    | 22     | 55.4 | 50.0 | 706      |
|                         | Reverse-1   | CCTCCACATCTCTACGCATTTTC   | 722   | 18     | 55.8 | 55.6 |          |
|                         | Forward-2   | TCGGATCGTAAAGCTCTGTTG     | 427   | 21     | 54.7 | 47.6 | 811      |
|                         | Reverse-2   | GTGTGTAGCCCAGGTCATAAG     | 1238  | 21     | 55.1 | 52.4 |          |
|                         | Forward-3   | GGGAGCGAACAGGATTAGATAC    | 781   | 22     | 54.7 | 50.0 | 739      |
|                         | Reverse-3   | CGGCTACCTTGTTACGACTT      | 1520  | 20     | 54.6 | 50.0 |          |

578

579

580

581

582 **Table 2.** List of bacterial isolates which showed a white light fluorescence under UV light when  
 583 grown on different sugars. The white fluorescence indicates the accumulating of PHA (Oshiki et al.,  
 584 2011).  
 585

| Bacteria's no.          | Bacteria genus                    | Sugar type |     |     |     |     |     |     |    |     |   |
|-------------------------|-----------------------------------|------------|-----|-----|-----|-----|-----|-----|----|-----|---|
|                         |                                   | Gal        | Mat | Fru | Ara | Mas | Glu | Rha | GA | Xyl |   |
| 49                      | <i>Sulfitobacter</i>              | +          |     | +   |     |     |     | +   |    |     | + |
| 3                       | <i>Bacillus sp.</i>               | +          | +   | +   |     |     |     | +   |    |     |   |
| 25, 26, 27              | <i>Uncultured Altermonas</i>      |            | +   | +   |     |     |     | +   | +  |     | + |
| 28                      | <i>Altermonas</i>                 |            | +   | +   |     |     |     | +   | +  |     | + |
| 52, 56                  | <i>Unclassified vibrio</i>        |            | +   | +   |     |     |     | +   |    |     |   |
| 41                      | <i>Vibrio sp.</i>                 |            | +   | +   |     |     |     | +   |    |     |   |
| 6, 37                   | <i>Sulfitobacter sp.</i>          |            |     |     |     |     |     | +   |    |     | + |
| 68, 80, 81, 85          | <i>Unclassified Microbacteria</i> | +          |     | +   | +   | +   | +   | +   |    |     | + |
| 86                      | <i>Unclassified Microbacteria</i> | +          |     | +   | +   | +   | +   | +   | +  |     | + |
| 75-76, 92, 104-105, 107 | <i>Cobetia</i>                    | +          | +   | +   |     |     |     | +   |    |     |   |
| 13                      | <i>Pseudoaltermononas</i>         | +          | +   | +   |     | +   | +   | +   |    |     |   |
| 71                      | <i>Pseudoaltermononas</i>         | +          |     | +   | +   | +   | +   | +   | +  |     |   |
| 14                      | <i>Pseudoaltermononas</i>         | +          | +   | +   |     |     |     | +   |    |     |   |
| 65                      | <i>Cobetia</i>                    | +          | +   | +   |     |     |     | +   |    |     |   |
| 82                      | <i>Sulfitobacter sp.</i>          |            |     |     |     |     |     | +   |    |     |   |
| 48                      | <i>Sulfitobacter sp.</i>          |            |     |     |     |     |     |     |    |     | + |

586 + Positive-PHA. Gal-galactose; Mat-mannitol; Fru-fructose; Ara-arabinose; Mas-mannose; Glu-glucose; Rha-  
 587 rhamnose; GA-glucuronic Acid; Xyl-xylose.  
 588

589 **Table 3.** Microbial production of PHA from different supplemented sugars. A total of 10 bacteria  
 590 were analyzed on different sugars for PHA production. The best bacteria with the highest PHA  
 591 production were listed in the table below. DCW represents “Dry Cell Weight”. SD represents  
 592 “Standard Deviation”.

593

| Organism Name                           | Sugar Type | DCW (g L <sup>-1</sup> ) | PHA Yield (mg L <sup>-1</sup> ) | PHA Yield (%DCW) | SD of PHA% | Monomer Composition (mol%), 3HB |
|-----------------------------------------|------------|--------------------------|---------------------------------|------------------|------------|---------------------------------|
| <i>Bacillus isolate no. 3</i>           | Fructose   | 1.14                     | 114                             | 10.03            | 0.76       | 100                             |
|                                         | Glucose    | 1.96                     | 221                             | 13.97            | 1.13       | 100                             |
| <i>Sulfitobacter sp. Isolate no. 48</i> | Mannitol   | 2.54                     | 196                             | 7.73             | 0.98       | 100                             |
| <i>Cobetia isolate no. 65</i>           | Mannitol   | 6.36                     | 125                             | 17.11            | 1.41       | 100                             |
|                                         | Galactose  | 1.06                     | 573                             | 11.83            | 1.45       | 100                             |
| <i>Pseudoaltermonas isolate no. 71</i>  | Fructose   | 2.54                     | 189                             | 7.46             | 0.64       | 100                             |
| <i>Cobetia isolate no. 75</i>           | Fructose   | 2.08                     | 125                             | 8.63             | 1.15       | 100                             |
|                                         | Galactose  | 0.78                     | 180                             | 16.04            | 1.32       | 100                             |
|                                         | Mannitol   | 4.72                     | 762                             | 18.56            | 0.88       | 100                             |
|                                         | Glucose    | 3.72                     | 876                             | 20.91            | 0.82       | 100                             |
| <i>Cobetia isolate no. 76</i>           | Mannose    | 3.68                     | 151                             | 1.89             | 0.41       | 100                             |
| <i>Cobetia isolate no. 92</i>           | Fructose   | 3.26                     | 206                             | 4.45             | 0.92       | 100                             |
|                                         | Mannitol   | 4.50                     | 251                             | 8.91             | 0.51       | 100                             |
|                                         | Galactose  | 1.88                     | 355                             | 7.69             | 1.35       | 100                             |
| <i>Cobetia isolate no. 104</i>          | Galactose  | 1.02                     | 111                             | 10.87            | 1.34       | 100                             |
|                                         | Mannitol   | 1.02                     | 116                             | 11.34            | 0.75       | 100                             |
|                                         | Glucose    | 0.82                     | 131                             | 16.01            | 1.12       | 100                             |
|                                         | Fructose   | 4.44                     | 718                             | 23.29            | 0.57       | 100                             |
| <i>Cobetia isolate no. 105</i>          | Mannitol   | 4.58                     | 574                             | 61.00            | 1.23       | 100                             |
| <i>Cobetia isolate no. 107</i>          | Glucose    | 2.03                     | 231                             | 11.37            | 0.95       | 100                             |
|                                         | Fructose   | 3.53                     | 968                             | 27.45            | 0.84       | 100                             |

594

595

596

597 **Table 4.** Microbial production of P(3HB) using mixed culture and mixed sugars. A Comparison  
 598 between pure and mixed bacteria cultures from *Cobetia* and *Bacillus* genus are grown on single and  
 599 mixture sugars substrates. DCW represents “dry cell weight”, and P(3HB) presents poly-3-  
 600 hydroxybutyrate. *Cobetia* presented as Cob. and *Bacillus* presents as Bac.

601

| Bacteria/ bacterial mixture                      | Sugar/sugar mixture | DCW (mg L <sup>-1</sup> ) | P(3HB) in DCW (%) | SD of PHA% |
|--------------------------------------------------|---------------------|---------------------------|-------------------|------------|
| <i>Cob.</i> 75, <i>Cob.</i> 107                  | Glucose             | 97                        | 1.45              | 1.12       |
| <i>Cob.</i> 104, <i>Cob.</i> 107                 | Fructose            | 98                        | 10.05             | 0.87       |
| <i>Bac.</i> 3, <i>Cob.</i> 75 <i>Cob.</i> 107    | Glucose             | 62                        | 2.27              | 0.91       |
| <i>Cob.</i> 65, <i>Cob.</i> 75, <i>Cob.</i> 105  | Mannitol            | 39                        | 11.61             | 1.24       |
| <i>Cob.</i> 65, <i>Cob.</i> 75, <i>Cob.</i> 92   | Galactose           | 32                        | 5.15              | 1.56       |
| <i>Cob.</i> 92, <i>Cob.</i> 104. <i>Cob.</i> 107 | Fructose            | 45                        | 0.70              | 0.76       |

602

603 **Table 5.** Analysis of sugars obtained by acid hydrolysis of *Ulva* sp.

| Glucose mg/g | Rhamnose mg/g | Galactose mg/g | Xylose mg/g | Fructose mg/g | Glu acid mg/g | Total mg/g |
|--------------|---------------|----------------|-------------|---------------|---------------|------------|
| 16.1±0.8     | 6.2±0.45      | 1.0±0.11       | 1.6±0.22    | 2.8±0.41      | 1.3±0.11      | 27.1±1.83  |

604

605

606

607

608

609

## Figures

610

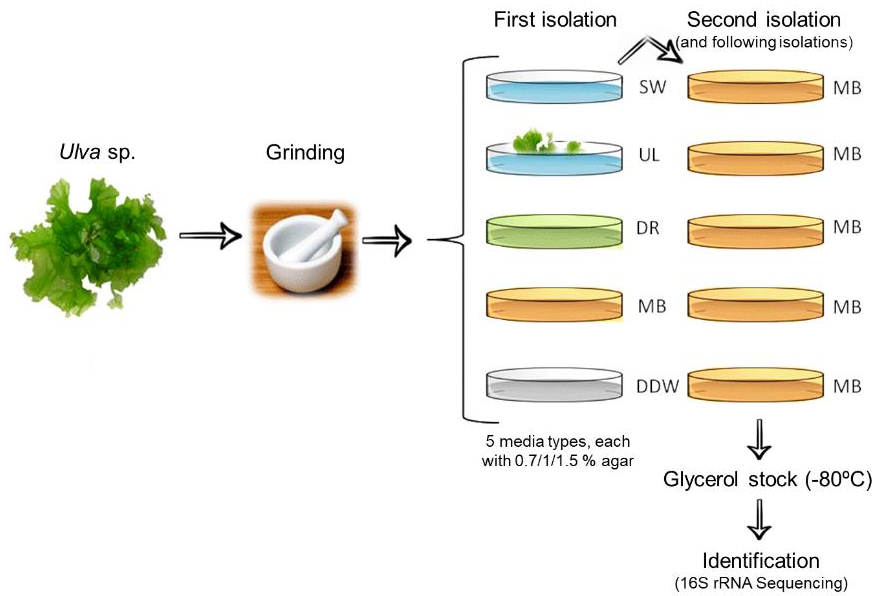

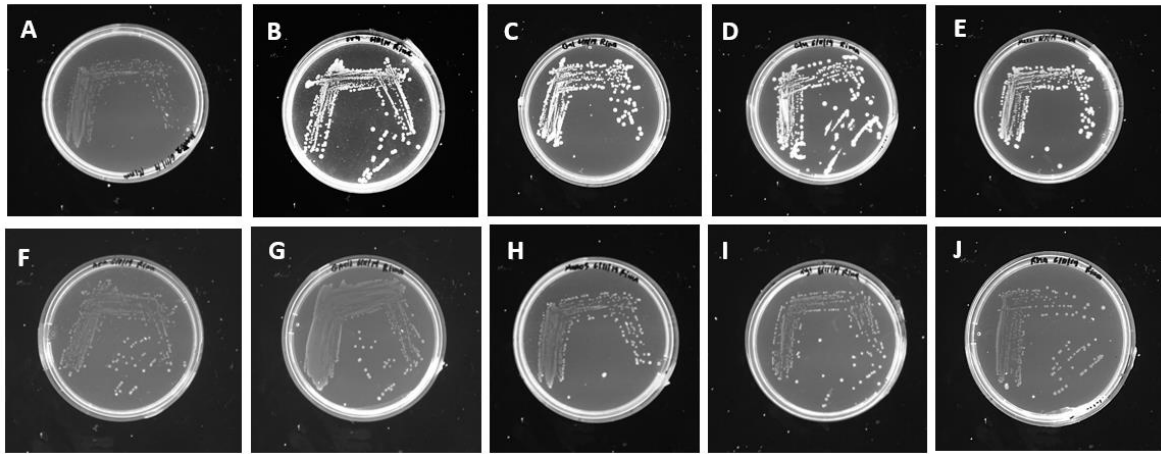

621

622 **Figure 2.** Screening of *Cobetia* (no. 104) for PHA production on different sugars under UV light: **A-**  
623 **negative control, B-fructose, C-galactose, D-glucose, E-mannitol, F-arabinose, G-glucuronic acid,**  
624 **H-mannose, I-xylose, J-rhamnose.** Fluorescence indicates the presence of PHA accumulation inside  
625 the bacterial cells. *Cobetia* (no. 104) utilize mannitol, fructose, galactose and glucose for PHA  
626 production while no PHA is observed on other sugars.

627

628

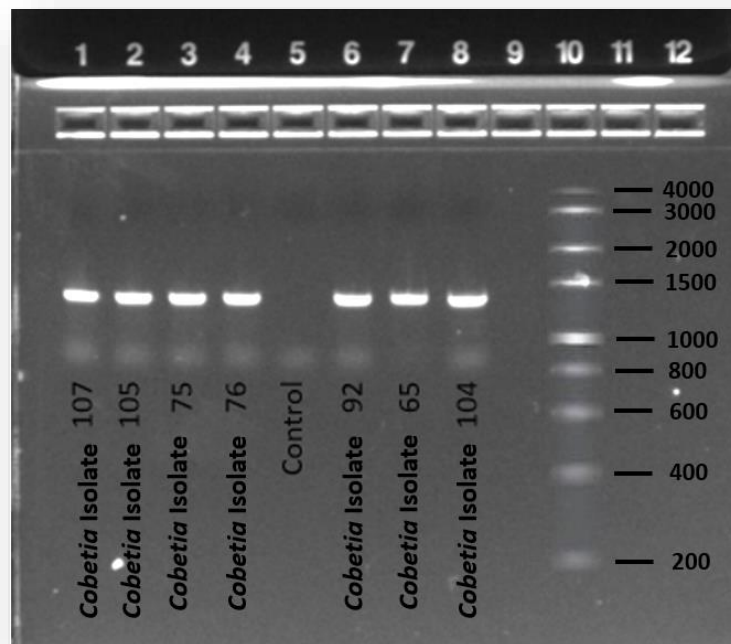

629

630 **Figure 3.** Agarose gel electrophoresis represents the amplicon of 16S rRNA gene of strains isolated  
631 from seaweeds associated bacteria.

632

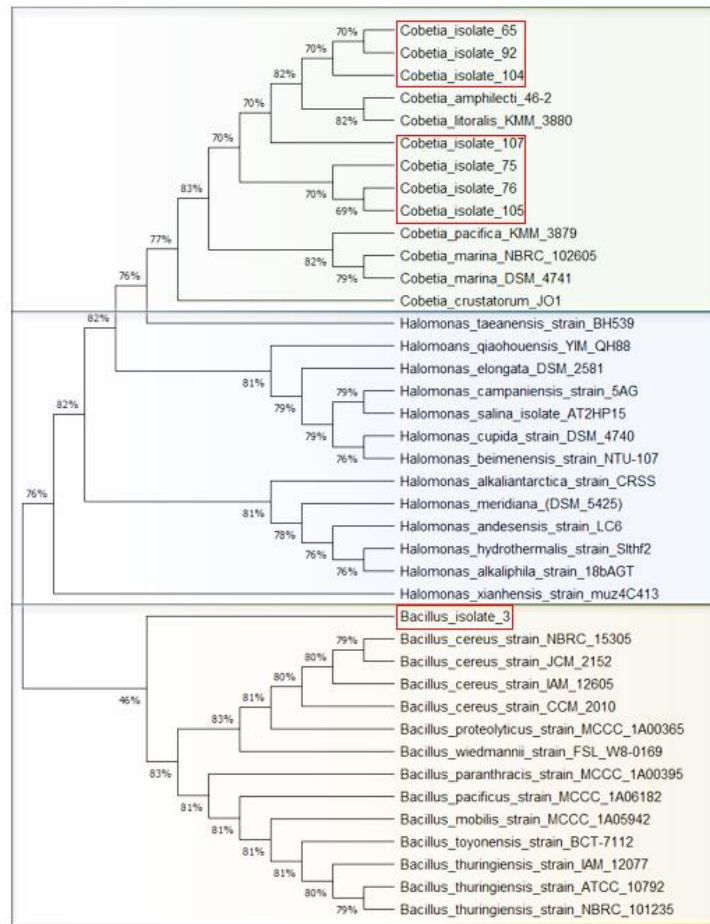

633

634

635 **Figure 4.** Phylogenetic relationships among the isolates drawn by MEGA 5 with 100 resamplings.

636 The bacteria in bold were isolated in the current study.

637

638

639

640

641

642

643



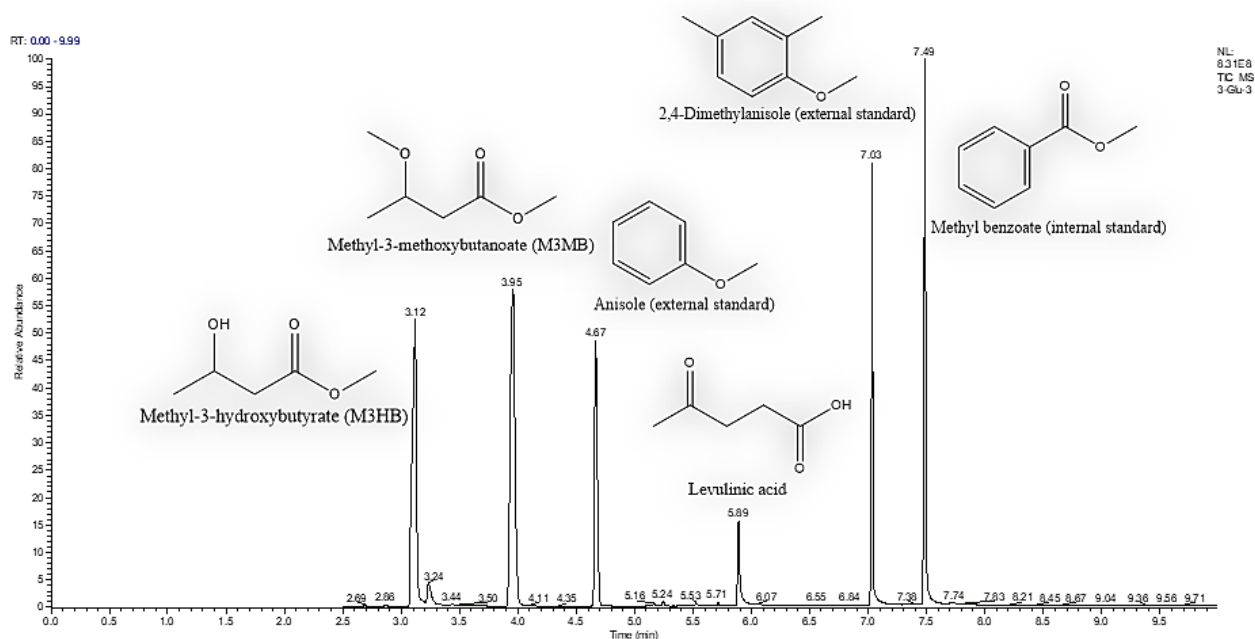

644

645 **Figure 5.** GC-MS chromatogram of methylated derivatives of 3HB (M3HB and M3MB), levulinic  
646 acid and three standards (aniso, methyl benzoate and 2,4-dimethyl aniso).

647

648

649

650

651

652

653

654

655

656

657

658

659

660

661

662

663

664

665

666

667

668

669

670

671

672

673

674

675

676

677

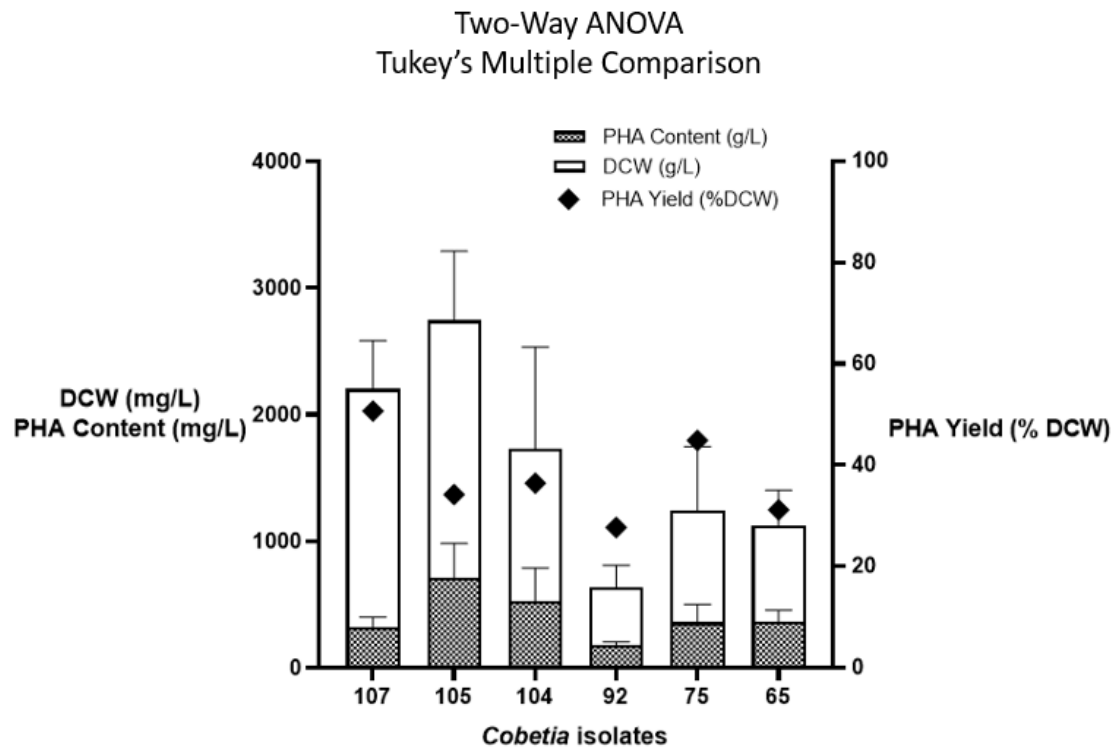

678

679 **Figure 6.** P(3HB) content, P(3HB) yield and DCW of six *Cobetia* strains (*Cobetia* isolate no. 107,  
680 *Cobetia* isolate no. 105, *Cobetia* isolate no. 104, *Cobetia* isolate no. 92, *Cobetia* isolate no. 75, and  
681 *Cobetia* isolate no. 65 grown on a mixture carbon source, i.e. glucose, fructose and mannitol. Five  
682 replicates were obtained. Two-Way ANOVA, Tukey's multiple comparison test was performed.  
683

One-Way ANOVA  
Holm-Sidak's multiple comparisons test

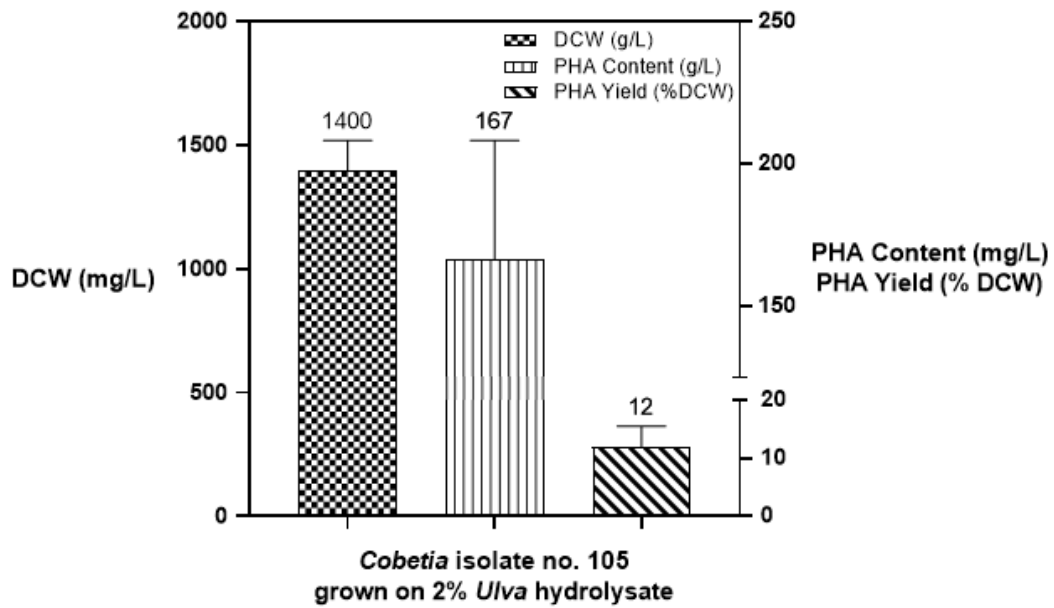

"DCW (g/L) vs. PHA Content (g/L)" \*\*\*\*  $p < 0.0001$   
"DCW (g/L) vs. PHA Yield (%DCW)" \*\*\*\*  $p < 0.0001$   
"PHA Content (g/L) vs. PHA Yield (%DCW)" \*  $p < 0.04$

684

685

686 **Figure 7.** PHA content, PHA yield and DCW of *Cobetia* isolate no. 105 grown on *Ulva* sp.  
687 hydrolysate as a sole carbon. One-Way ANOVA, Holm Sidak's multiple comparison test was  
688 performed.

689

690

691

692

693

694

695

696

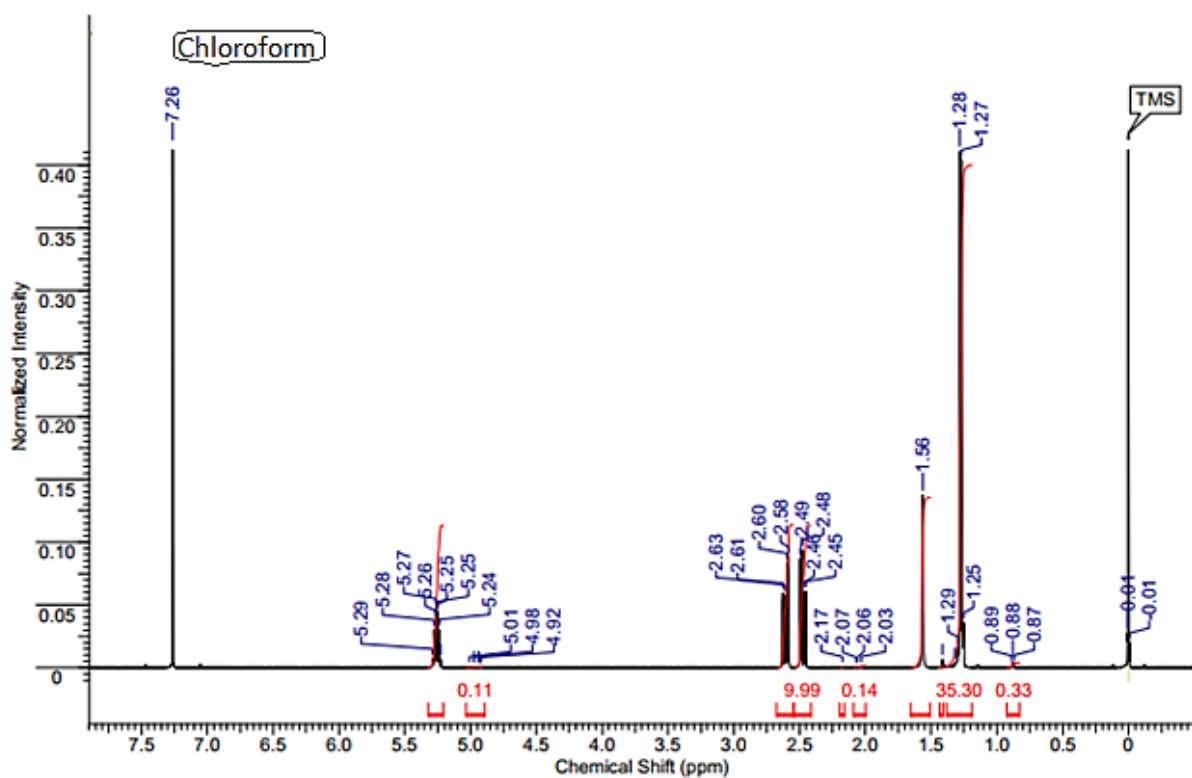

697

698 **Figure 8.**  $^1\text{H}$  NMR spectrum of the P(3HBV) produced by *Cobetia* isolate no. 105 when grown on  
699 sugar mixture, i.e. glucose, fructose and mannitol and extracted with chloroform.

700

701

702

703

704

705

706

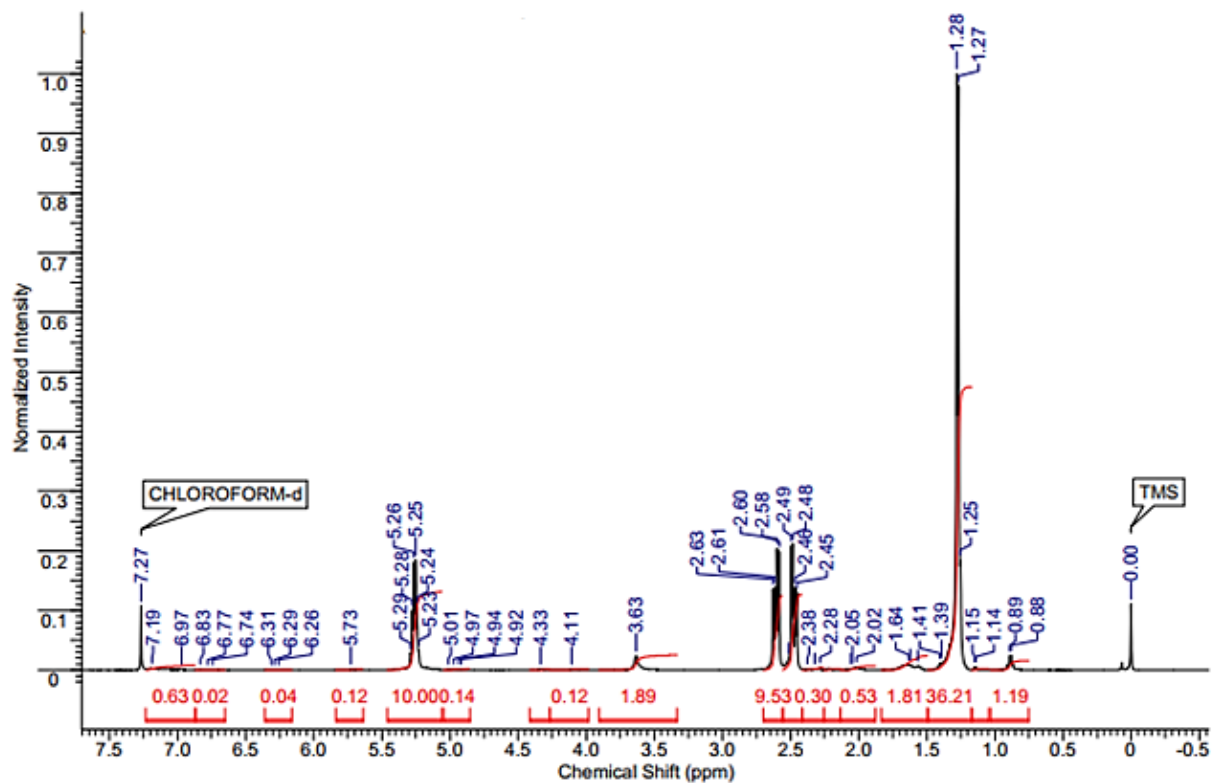

707

708 **Figure 9.**  $^1\text{H}$  NMR spectrum of the P((3HBV) produced by *Cobetia* isolate no. 105 when grown on  
709 *Ulva* sp. hydrolysate and extracted with chloroform.

710

711

712
